# Supplementary material
Source: PubMed Central journal article supplement (PMC2634825)
Supplement: NIHMS86603-supplement-1_si_001.pdf [file NIHMS86603-supplement-1_si_001.pdf]

Supplementary Materials for the Manuscript Entitled

**“Improving Tumor-Targeting Capability and Pharmacokinetics of**

**<sup>99m</sup>Tc-Labeled Cyclic RGD Dimers with PEG<sub>4</sub> Linkers”**

by

Lijun Wang<sup>1</sup>, Jiyun Shi<sup>1</sup>, Young-Seung Kim<sup>1</sup>, Shizhen Zhai<sup>1</sup>, Bing Jia<sup>2</sup>, Huiyun Zhao<sup>2</sup>, Fan Wang<sup>2</sup>,  
Zhaofei Liu<sup>3</sup>, Xiaoyuan Chen<sup>3</sup>, and Shuang Liu<sup>1\*</sup>

<sup>1</sup>School of Health Sciences, Purdue University, IN 47907, USA

<sup>2</sup>Medical Isotopes Research Center, Peking University, Beijing 100083, China

<sup>3</sup>Molecular Imaging Program at Stanford, Department of Radiology & Bio-X, Stanford University, Stanford, California, USA

Running Title: PEGylated cyclic RGD Dimers for Improved Tumor Targeting

---

<sup>1\*</sup>To whom correspondence should be addressed. School of Health Sciences, Purdue University, 550 Stadium Mall Drive, West Lafayette, IN 47907. Phone: 765-494-0236; Fax 765-496-1377; Email: [lius@pharmacy.purdue.edu](mailto:lius@pharmacy.purdue.edu)

## Contents of Supporting Information

Table SI. Biodistribution data and T/B ratios of  $^{99m}\text{Tc}$ -2PEG<sub>4</sub>-dimer in the athymic nude mice bearing MDA-MB-435 human breast cancer xenografts. The organ uptake is expressed as %ID/g. Each data point represents an average of biodistribution data from four animals.

Table SII. Biodistribution data and T/B ratios of  $^{99m}\text{Tc}$ -PEG<sub>4</sub>-dimer in the athymic nude mice bearing MDA-MB-435 human breast cancer xenografts. The organ uptake is expressed as %ID/g. Each data point represents an average of biodistribution data from four animals.

Table SIII. Biodistribution data and T/B ratios of  $^{99m}\text{Tc}$ -2PEG<sub>4</sub>-dimer in the athymic nude mice bearing U87MG human glioma xenografts. The organ uptake is expressed as %ID/g. Each data point represents an average of biodistribution data from four animals.

Table SIV. Biodistribution data and T/B ratios of  $^{99m}\text{Tc}$ -3PEG<sub>4</sub>-dimer in the athymic nude mice bearing U87MG human glioma xenografts. The organ uptake is expressed as %ID/g. Each data point represents an average of biodistribution data from four animals.

Table SV. Biodistribution data and T/B ratios of  $^{99m}\text{Tc}$ -PEG<sub>4</sub>-monomer in the athymic nude mice bearing U87MG human glioma xenografts. The organ uptake is expressed as %ID/g. Each data point represents an average of biodistribution data from four animals.

Figure SI. Radio-HPLC chromatograms of  $^{99m}\text{Tc}$ -PEG<sub>4</sub>-monomer in saline before injection (A), in the urine at 30 min p.i. (B), in the urine at 120 min p.i. (C), and in the feces at 120 min p.i. (D). Each mouse was administered with ~ 100  $\mu\text{Ci}$  of  $^{99m}\text{Tc}$ -PEG<sub>4</sub>-monomer.

Figure SII. Radio-HPLC chromatograms of  $^{99m}\text{Tc}$ -3PEG<sub>4</sub>-dimer in saline before injection (A), in the urine at 30 min p.i. (B), in the urine at 120 min p.i. (C), and in the feces at 120 min p.i. (D). Each mouse was administered with ~ 100  $\mu\text{Ci}$  of  $^{99m}\text{Tc}$ -3PEG<sub>4</sub>-dimer. Variation of HPLC retention times was caused by the presence of acetonitrile in both urine and feces samples.

Table SI. Biodistribution data and T/B ratios of  $^{99m}\text{Tc}$ -2PEG<sub>4</sub>-dimer in the athymic nude mice bearing MDA-MB-435 human breast cancer xenografts. The organ uptake is expressed as %ID/g. Each data point represents an average of biodistribution data from four animals.

| %ID/gram           | 30 min       | 60 min        | 120 min      | Blocking (60min) |
|--------------------|--------------|---------------|--------------|------------------|
| Blood              | 1.06 ± 0.12  | 0.85 ± 0.42   | 0.47 ± 0.22  | 0.85 ± 0.19      |
| Brain              | 0.2 ± 0.07   | 0.24 ± 0.10   | 0.18 ± 0.08  | 0.08 ± 0.04      |
| Eyes               | 1.46 ± 0.40  | 1.96 ± 0.78   | 1.89 ± 0.68  | 0.36 ± 0.12      |
| Heart              | 2.09 ± 0.34  | 3.07 ± 0.94   | 1.99 ± 0.53  | 0.53 ± 0.11      |
| Intestine          | 10.58 ± 4.17 | 13.36 ± 10.69 | 9.84 ± 4.64  | 1.44 ± 0.67      |
| Kidney             | 14.37 ± 4.09 | 17.71 ± 8.83  | 13.78 ± 5.36 | 18.34 ± 5.64     |
| Liver              | 2.97 ± 0.63  | 3.58 ± 1.72   | 3.27 ± 1.09  | 1.49 ± 0.29      |
| Lungs              | 4.12 ± 0.82  | 5.01 ± 2.86   | 4.05 ± 1.20  | 1.93 ± 0.31      |
| Muscle             | 1.76 ± 0.56  | 1.59 ± 1.01   | 1.51 ± 0.35  | 0.76 ± 0.47      |
| Spleen             | 2.27 ± 0.86  | 3.74 ± 2.26   | 2.90 ± 1.13  | 0.52 ± 0.12      |
| MDA-MB-435         | 5.20 ± 1.84  | 8.30 ± 3.57   | 9.77 ± 2.66  | 2.43 ± 0.07      |
| Tumor/Blood Ratio  | 4.33 ± 1.82  | 9.97 ± 2.10   | 22.82 ± 9.09 | 2.98 ± 0.68      |
| Tumor/Liver Ratio  | 1.56 ± 0.37  | 2.37 ± 0.20   | 3.09 ± 0.76  | 1.67 ± 0.28      |
| Tumor/Lung Ratio   | 1.20 ± 0.19  | 1.80 ± 0.44   | 2.45 ± 0.34  | 1.28 ± 0.20      |
| Tumor/Muscle Ratio | 2.53 ± 0.84  | 6.80 ± 4.43   | 6.52 ± 1.72  | 5.09 ± 4.50      |

Table SII. Biodistribution data and T/B ratios of  $^{99m}\text{Tc}$ -PEG<sub>4</sub>-dimer in the athymic nude mice bearing MDA-MB-435 human breast cancer xenografts. The organ uptake is expressed as %ID/g. Each data point represents an average of biodistribution data from four animals.

| %ID/gram           | 30 min           | 60 min           | 120 min          |
|--------------------|------------------|------------------|------------------|
| Blood              | $0.63 \pm 0.25$  | $0.38 \pm 0.13$  | $0.32 \pm 0.06$  |
| Brain              | $0.10 \pm 0.01$  | $0.10 \pm 0.02$  | $0.18 \pm 0.03$  |
| Eyes               | $0.75 \pm 0.15$  | $1.34 \pm 0.49$  | $1.69 \pm 0.62$  |
| Heart              | $1.36 \pm 0.29$  | $1.84 \pm 0.41$  | $1.88 \pm 0.44$  |
| Intestine          | $4.64 \pm 1.69$  | $6.17 \pm 1.07$  | $4.93 \pm 0.20$  |
| Kidney             | $13.25 \pm 3.20$ | $11.27 \pm 2.01$ | $9.26 \pm 0.60$  |
| Liver              | $1.49 \pm 0.19$  | $1.59 \pm 0.31$  | $1.21 \pm 0.38$  |
| Lungs              | $2.46 \pm 0.29$  | $3.38 \pm 0.39$  | $2.63 \pm 0.38$  |
| Muscle             | $1.66 \pm 0.41$  | $1.72 \pm 0.16$  | $1.37 \pm 0.17$  |
| Spleen             | $1.08 \pm 0.22$  | $1.94 \pm 0.68$  | $2.39 \pm 0.45$  |
| MDA-MB-435         | $3.12 \pm 0.32$  | $3.80 \pm 0.88$  | $3.82 \pm 0.29$  |
| Tumor/Blood Ratio  | $6.39 \pm 1.59$  | $7.06 \pm 4.08$  | $10.72 \pm 1.73$ |
| Tumor/Liver Ratio  | $2.26 \pm 0.21$  | $2.31 \pm 0.73$  | $2.46 \pm 0.70$  |
| Tumor/Lung Ratio   | $1.30 \pm 0.05$  | $1.03 \pm 0.16$  | $1.76 \pm 0.74$  |
| Tumor/Muscle Ratio | $2.06 \pm 0.29$  | $1.90 \pm 0.51$  | $2.91 \pm 0.60$  |

Table SIII. Biodistribution data and T/B ratios of  $^{99m}\text{Tc}$ -2PEG<sub>4</sub>-dimer in the athymic nude mice bearing U87MG human glioma xenografts. The organ uptake is expressed as %ID/g. Each data point represents an average of biodistribution data from four animals.

| %ID/gram           | 30 min           | 60 min           | 120 min          |
|--------------------|------------------|------------------|------------------|
| Blood              | $1.16 \pm 0.15$  | $0.57 \pm 0.04$  | $0.29 \pm 0.05$  |
| Brain              | $0.25 \pm 0.03$  | $0.20 \pm 0.03$  | $0.18 \pm 0.02$  |
| Eyes               | $2.54 \pm 1.07$  | $1.88 \pm 0.15$  | $1.60 \pm 0.11$  |
| Heart              | $3.25 \pm 0.27$  | $2.16 \pm 0.21$  | $1.65 \pm 0.43$  |
| Intestine          | $16.06 \pm 6.63$ | $12.50 \pm 5.46$ | $9.81 \pm 1.98$  |
| Kidneys            | $20.81 \pm 2.32$ | $14.33 \pm 1.23$ | $10.21 \pm 1.37$ |
| Liver              | $4.25 \pm 0.51$  | $2.98 \pm 0.18$  | $2.46 \pm 0.32$  |
| Lungs              | $6.84 \pm 0.85$  | $5.38 \pm 0.44$  | $3.63 \pm 0.69$  |
| Muscle             | $2.18 \pm 0.37$  | $1.45 \pm 0.30$  | $1.27 \pm 0.20$  |
| Spleen             | $4.33 \pm 0.72$  | $3.62 \pm 0.46$  | $3.42 \pm 0.83$  |
| U87MG              | $11.17 \pm 1.96$ | $8.62 \pm 2.35$  | $8.31 \pm 2.31$  |
| Tumor/Blood Ratio  | $9.63 \pm 1.32$  | $15.30 \pm 4.24$ | $29.12 \pm 8.54$ |
| Tumor/Liver Ratio  | $2.59 \pm 0.45$  | $2.89 \pm 0.95$  | $3.33 \pm 0.64$  |
| Tumor/Lung Ratio   | $1.60 \pm 0.19$  | $1.59 \pm 0.47$  | $2.33 \pm 0.73$  |
| Tumor/Muscle Ratio | $5.07 \pm 0.37$  | $6.16 \pm 2.77$  | $6.46 \pm 1.21$  |

Table SIV. Biodistribution data and T/B ratios of  $^{99m}\text{Tc}$ -3PEG<sub>4</sub>-dimer in the athymic nude mice bearing U87MG human glioma xenografts. The organ uptake is expressed as %ID/g. Each data point represents an average of biodistribution data from four animals.

| %ID/gram           | 30 min           | 60 min           | 120 min           |
|--------------------|------------------|------------------|-------------------|
| Blood              | $1.02 \pm 0.22$  | $0.47 \pm 0.06$  | $0.17 \pm 0.02$   |
| Brain              | $0.21 \pm 0.07$  | $0.17 \pm 0.03$  | $0.13 \pm 0.01$   |
| Eyes               | $1.58 \pm 0.17$  | $1.40 \pm 0.13$  | $1.50 \pm 0.12$   |
| Heart              | $2.24 \pm 0.20$  | $1.67 \pm 0.15$  | $1.29 \pm 0.08$   |
| Intestine          | $10.05 \pm 2.47$ | $9.45 \pm 1.31$  | $10.11 \pm 2.49$  |
| Kidney             | $17.60 \pm 0.73$ | $12.28 \pm 1.09$ | $9.89 \pm 1.20$   |
| Liver              | $3.14 \pm 0.18$  | $2.92 \pm 0.77$  | $2.50 \pm 0.19$   |
| Lungs              | $5.15 \pm 0.36$  | $4.25 \pm 0.63$  | $3.56 \pm 0.41$   |
| Muscle             | $1.45 \pm 0.20$  | $1.12 \pm 0.15$  | $0.89 \pm 0.10$   |
| Spleen             | $3.52 \pm 0.16$  | $3.11 \pm 0.18$  | $3.05 \pm 0.71$   |
| U87MG              | $8.17 \pm 0.68$  | $7.24 \pm 0.95$  | $9.74 \pm 3.22$   |
| Tumor/Blood Ratio  | $6.72 \pm 2.88$  | $15.36 \pm 1.01$ | $48.84 \pm 18.74$ |
| Tumor/Liver Ratio  | $2.13 \pm 0.87$  | $2.55 \pm 0.36$  | $3.49 \pm 1.64$   |
| Tumor/Lung Ratio   | $1.31 \pm 0.56$  | $1.71 \pm 0.05$  | $2.51 \pm 1.32$   |
| Tumor/Muscle Ratio | $3.39 \pm 1.85$  | $6.58 \pm 1.58$  | $11.18 \pm 4.34$  |

Table SV. Biodistribution data and T/B ratios of  $^{99m}\text{Tc}$ -PEG<sub>4</sub>-monomer in the athymic nude mice bearing U87MG human glioma xenografts. The organ uptake is expressed as %ID/g. Each data point represents an average of biodistribution data from four animals.

| %ID/gram           | 30 min           | 60 min          | 120 min          |
|--------------------|------------------|-----------------|------------------|
| Blood              | $1.31 \pm 0.22$  | $0.45 \pm 0.04$ | $0.22 \pm 0.07$  |
| Brain              | $0.17 \pm 0.06$  | $0.10 \pm 0.01$ | $0.08 \pm 0.01$  |
| Eyes               | $1.52 \pm 0.47$  | $0.78 \pm 0.07$ | $0.63 \pm 0.04$  |
| Heart              | $1.48 \pm 0.19$  | $0.80 \pm 0.04$ | $0.62 \pm 0.10$  |
| Intestine          | $8.06 \pm 2.70$  | $3.51 \pm 0.78$ | $3.04 \pm 0.69$  |
| Kidneys            | $10.78 \pm 1.82$ | $5.95 \pm 0.34$ | $4.04 \pm 0.69$  |
| Liver              | $3.43 \pm 1.00$  | $2.17 \pm 0.08$ | $1.99 \pm 0.44$  |
| Lungs              | $5.14 \pm 1.40$  | $2.75 \pm 0.11$ | $1.79 \pm 0.17$  |
| Muscle             | $1.65 \pm 0.25$  | $0.87 \pm 0.10$ | $0.62 \pm 0.15$  |
| Spleen             | $3.37 \pm 0.70$  | $2.83 \pm 0.44$ | $2.47 \pm 0.54$  |
| U87MG              | $4.74 \pm 2.71$  | $4.26 \pm 0.93$ | $3.08 \pm 0.83$  |
| Tumor/Blood Ratio  | $3.85 \pm 2.47$  | $9.47 \pm 2.69$ | $15.50 \pm 5.47$ |
| Tumor/Liver Ratio  | $1.47 \pm 0.91$  | $1.97 \pm 0.42$ | $1.55 \pm 0.38$  |
| Tumor/Lung Ratio   | $0.95 \pm 0.54$  | $1.55 \pm 0.31$ | $1.73 \pm 0.37$  |
| Tumor/Muscle Ratio | $2.90 \pm 1.67$  | $4.93 \pm 1.06$ | $5.12 \pm 1.88$  |

# $^{99m}\text{Tc}$ -PEG<sub>4</sub>-monomer

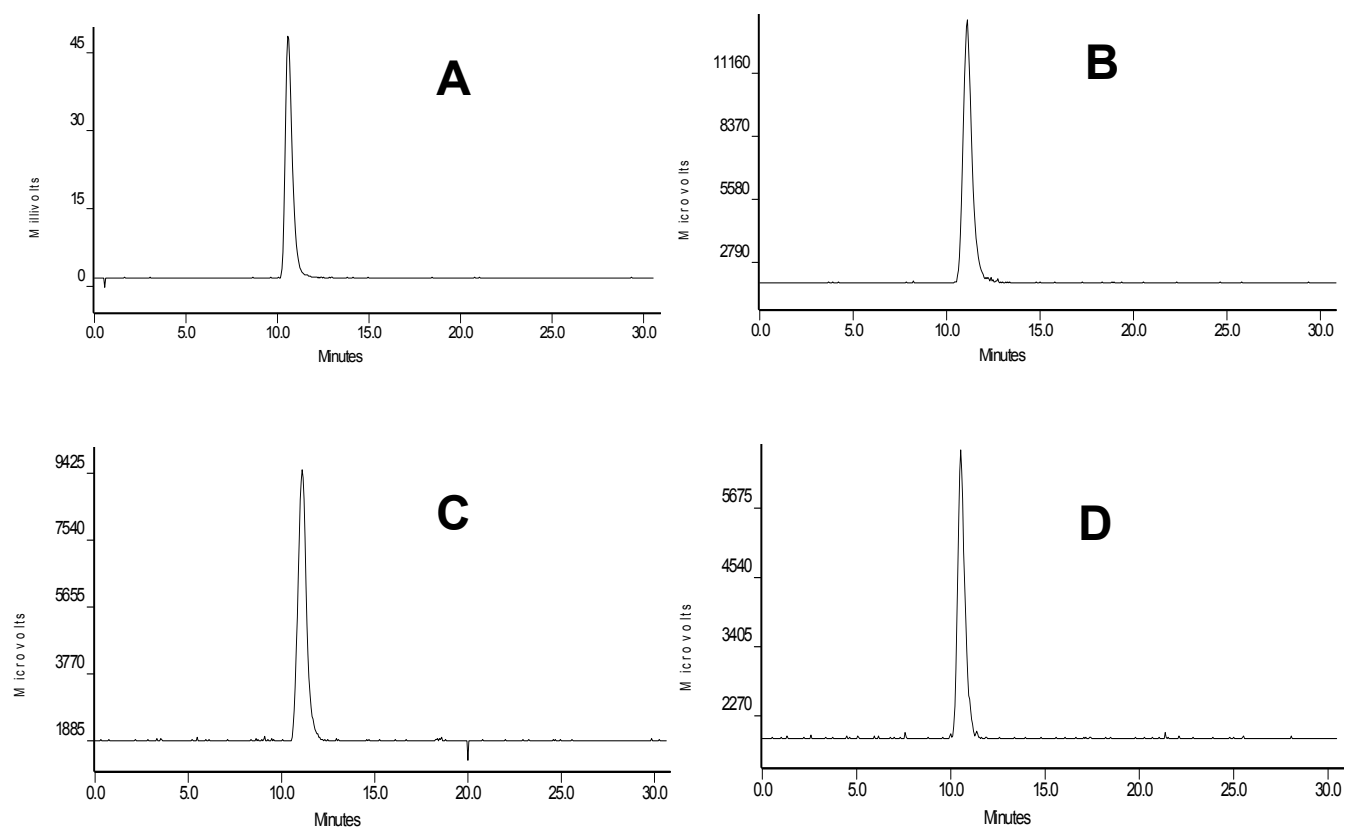

Figure SI. Radio-HPLC chromatograms of  $^{99m}\text{Tc}$ -PEG<sub>4</sub>-monomer in saline before injection (A), in the urine at 30 min p.i. (B), in the urine at 120 min p.i. (C), and in the feces at 120 min p.i. (D). Each mouse was administered with  $\sim 100\ \mu\text{Ci}$  of  $^{99m}\text{Tc}$ -PEG<sub>4</sub>-monomer.

## $^{99m}\text{Tc}$ -3PEG<sub>4</sub>-dimer

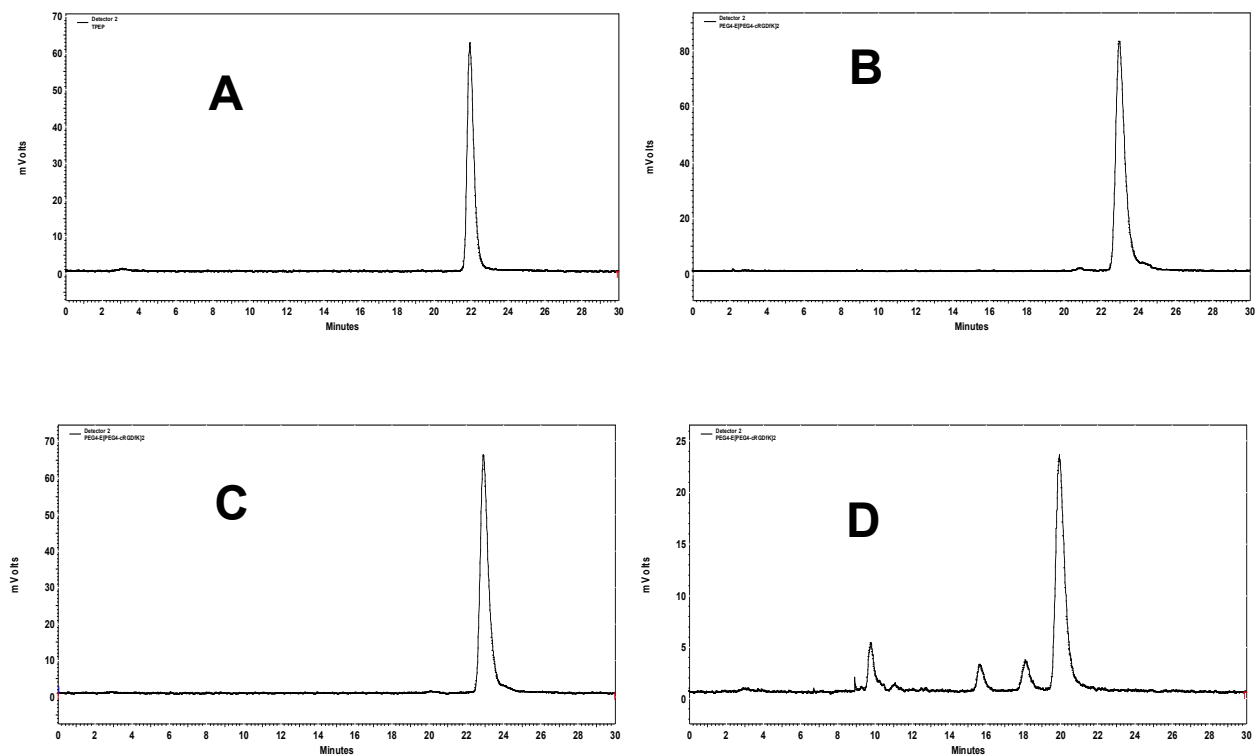

Figure SII. Radio-HPLC chromatograms of  $^{99m}\text{Tc}$ -3PEG<sub>4</sub>-dimer in saline before injection (A), in the urine at 30 min p.i. (B), in the urine at 120 min p.i. (C), and in the feces at 120 min p.i. (D). Each mouse was administered with  $\sim 100 \mu\text{Ci}$  of  $^{99m}\text{Tc}$ -3PEG<sub>4</sub>-dimer. Variation of HPLC retention times was caused by the presence of acetonitrile in both urine and feces samples.
